# Supplementary material
Source: Springer Nature journal article supplement (https://www.springermedizin.de/resource/supplementary/12905_2011_257_MOESM1_ESM.pdf/9518296)
Supplement: MOESM1 [file 9518296]

**Table 1: Demographic Characteristics of the FSWs Interviewed**

| <b>ID No.</b> | <b>Age</b> | <b>Marital status</b> | <b>Education<br/>(highest level)</b> | <b>Place of work / where based</b> |
|---------------|------------|-----------------------|--------------------------------------|------------------------------------|
| 1             | 28         | Married               | Grade 5                              | NGO outreach worker                |
| 2             | 19         | Separated             | Grade 9                              | Restaurant dancer                  |
| 3             | 24         | Married               | Illiterate                           | Street                             |
| 4             | 39         | single                | Illiterate                           | Restaurant worker                  |
| 5             | 22         | Separated             | Illiterate                           | Cabin Restaurant                   |
| 6             | 22         | Married               | Literate                             | Street                             |
| 7             | 42         | Widowed               | Literate                             | Massage parlour owner centre       |
| 8             | 30         | Married               | Literate                             | Massage parlour owner centre       |
| 9             | 25         | Married               | Literate                             | Street                             |
| 10            | 26         | Single                | SLC                                  | Local bar/restaurant               |
| 11            | 30         | Separate              | Grade 5                              | Restaurant worker                  |
| 12            | 24         | Single                | Grade 9                              | Hotel call girl                    |
| 13            | 22         | Separate              | Literate                             | Restaurant worker                  |
| 14            | 30         | Married               | Literate                             | NGO outreach worker educator       |
| 15            | 30         | Single                | Literate                             | Street                             |
